# Supplementary material for: Study of the Mechanism Underlying the Onset of Diabetic Xeroderma Focusing on an Aquaporin-3 in a Streptozotocin-Induced Diabetic Mouse Model
Source: MDPI journal article supplement (doi:10.3390/ijms20153782), 2019-08-02
Supplement: s1 [file s1]

**Supplementary date:** Study of the mechanism underlying the onset of diabetic xeroderma focusing on an aquaporin-3 in a streptozotocin-induced diabetic mouse model

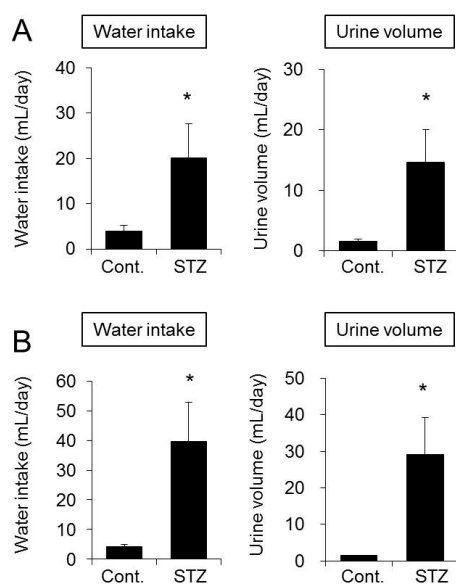

**Figure S1. Water intake and urine volume**

Mice were given a single intravenous administration of STZ. After 1 weeks (A) or 2 weeks (B), water intake and urine volume were measured (mean  $\pm$  SD,  $n = 5$ ; \*  $p < 0.05$ ).

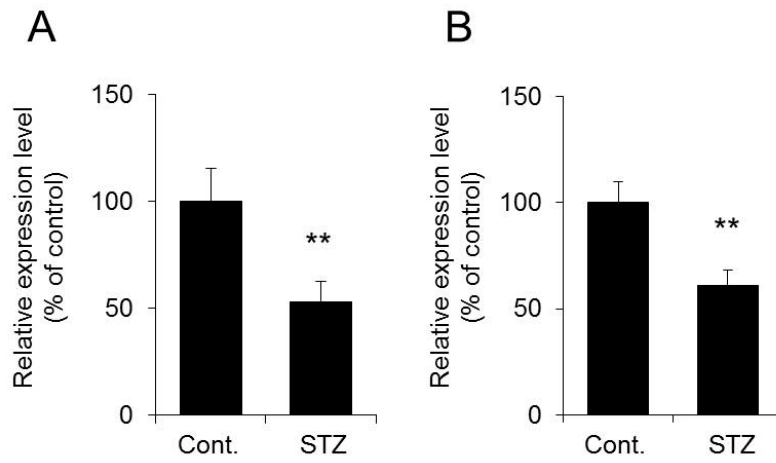

**Figure S2. Expression levels of *Sod1* and *Sod2* in the skin**

Mice were given a single intravenous administration of STZ. After 2 weeks, the mRNA expression levels of *Sod1* and *Sod2* in the skin were measured by real-time RT-PCR. After normalization with *18S rRNA*, the data are presented with the mean value of the control group set at 100% (mean  $\pm$  SD,  $n = 5$ , \*\*  $p < 0.01$ ).
